# Supplementary material for: Effect of inorganic nitrate or nitrite supplementation on exercise capacity for heart failure: a systematic review and meta-analysis of randomized controlled trials
Source: Research Square preprint supplement (doi:10.21203/rs.3.rs-1605412/v1), 2022-06-02
Supplement: Supplementary file 1 [file 17ebd57c775469f1f6ea320b.docx]

| **Appendix 2.Cochrane Risk of Bias Assessment** | | | | | | | |
| --- | --- | --- | --- | --- | --- | --- | --- |
| Criterion  Study ID | Random Sequence generation | Allocation concealment | Blinding of participants and personnel | Blinding of outcome assessment | Incomplete outcome data | Selective outcome reporting | Other potential risk of bias |
| AR Coggan 201525 | L | U | L | L | L | L | L |
| AR Coggan 201821 | L | U | L | U | L | L | L |
| BA Borlaug 201527 | L | L | L | L | L | L | L |
| BA Borlaug 201628 | L | L | L | L | L | L | L |
| BA Borlaug 201829 | L | L | L | U | L | L | L |
| DM Hirai 201720 | L | U | L | U | L | L | L |
| HA Shaltout 201730 | L | U | L | L | L | L | L |
| J Eggebeen 201631 | L | U | L | L | L | L | L |
| MN Woessner 202026 | L | U | L | U | L | L | L |
| P Zamani 201532 | L | U | L | U | L | L | L |
| P Zamani 201733 | L | U | L | L | L | L | L |
